# Supplementary material
Source: publisher figshare collection journal article supplement (https://acs.figshare.com/ndownloader/files/4653919)
Supplement: Supplementary file 1 [file 4653919]

data_RPS_I_79_chir_L_cif 
_audit_creation_date        07-07-12
_audit_creation_method CRYSTALS_ver_12.84

_oxford_structure_analysis_title  'RPS_I_79_CHIR_L_0m in P2(1)'
_chemical_name_systematic         ?
_chemical_melting_point           ?

_cell_length_a                    12.2732(9)
_cell_length_b                    10.6002(7)
_cell_length_c                    13.1907(9)
_cell_angle_alpha                 90
_cell_angle_beta                  95.895(3)
_cell_angle_gamma                 90
_cell_volume                      1707.0(2)
 
_symmetry_cell_setting            'Monoclinic' 
_symmetry_space_group_name_H-M    'P 1 21 1 ' 
_symmetry_space_group_name_Hall   '?' 
loop_
 _symmetry_equiv_pos_as_xyz
 'x,y,z'
 '-x,y+1/2,-z'

loop_
_atom_type_symbol
_atom_type_scat_dispersion_real
_atom_type_scat_dispersion_imag
_atom_type_scat_Cromer_Mann_a1
_atom_type_scat_Cromer_Mann_b1
_atom_type_scat_Cromer_Mann_a2
_atom_type_scat_Cromer_Mann_b2
_atom_type_scat_Cromer_Mann_a3
_atom_type_scat_Cromer_Mann_b3
_atom_type_scat_Cromer_Mann_a4
_atom_type_scat_Cromer_Mann_b4
_atom_type_scat_Cromer_Mann_c
_atom_type_scat_source  
 C       0.0033   0.0016   2.3100  20.8439   1.0200  10.2075   1.5886   0.5687
   0.8650  51.6512   0.2156 'International Tables Vol C 4.2.6.8 and 6.1.1.4'
 H       0.0000   0.0000   0.4930  10.5109   0.3229  26.1257   0.1402   3.1424
   0.0408  57.7998   0.0030 'International Tables Vol C 4.2.6.8 and 6.1.1.4'
 O       0.0106   0.0060   3.0485  13.2771   2.2868   5.7011   1.5463   0.3239
   0.8670  32.9089   0.2508 'International Tables Vol C 4.2.6.8 and 6.1.1.4'
 Cl      0.1484   0.1585  11.4604   0.0104   7.1964   1.1662   6.2556  18.5194
   1.6455  47.7784  -9.5574 'International Tables Vol C 4.2.6.8 and 6.1.1.4'
 Br     -0.2901   2.4595  17.1789   2.1723   5.2358  16.5796   5.6377   0.2609
   3.9851  41.4328   2.9557 'International Tables Vol C 4.2.6.8 and 6.1.1.4'
 
 
_cell_formula_units_Z                    2

# Given Formula = C30 H24 Br2 Cl2 O6 
# Dc =      1.38 Fooo =    840.00 Mu =     25.67 M =    711.23
# Found Formula = C34 H32 Br2 Cl2 O10 
# Dc =      1.62 FOOO =    840.00 Mu =     25.88 M =    831.34

_chemical_formula_sum             'C34 H32 Br2 Cl2 O10'
_chemical_formula_moiety          'C34 H32 Br2 Cl2 O10'
_chemical_compound_source                ?
_chemical_formula_weight            831.34
 
 
_cell_measurement_reflns_used         2240
_cell_measurement_theta_min              2
_cell_measurement_theta_max             19
_cell_measurement_temperature          120
 
_exptl_crystal_description        'fragment' 
_exptl_crystal_colour             'colorless' 
_exptl_crystal_size_min           0.15 
_exptl_crystal_size_mid           0.17 
_exptl_crystal_size_max           0.31 
 
_exptl_crystal_density_diffrn     1.617 
_exptl_crystal_density_meas       ? 
# Non-dispersive F(000): 
_exptl_crystal_F_000              840 
_exptl_absorpt_coefficient_mu     2.588 
 
# Sheldrick geometric approximatio 0.64 0.67 
_exptl_absorpt_correction_type    multi-scan 
_exptl_absorpt_process_details    'DENZO/SCALEPACK (Otwinowski & Minor, 1997)' 
_exptl_absorpt_correction_T_min   0.64 
_exptl_absorpt_correction_T_max   0.67 
_diffrn_measurement_device_type   'KappaCCD ApexII' 
_diffrn_radiation_monochromator   'graphite' 
_diffrn_radiation_type            'Mo K\a'
_diffrn_radiation_wavelength           0.71073
_diffrn_measurement_method        '\f & \w scans' 
 
# If a reference occurs more than once, delete the author 
# and date from subsequent references. 
_computing_data_collection        'SMART (Siemens, 1993)' 
_computing_cell_refinement        'SAINT (Siemens ,1995)' 
_computing_data_reduction         'SAINT (Siemens ,1995)' 
_computing_structure_solution     'SIR92 (Altomare et al., 1994)' 
_computing_structure_refinement   'CRYSTALS (Betteridge et al., 2003)' 
_computing_publication_material   'CRYSTALS (Betteridge et al., 2003)' 
_computing_molecular_graphics     'CAMERON (Watkin et al., 1996)' 
 
_diffrn_standards_interval_time   ? 
_diffrn_standards_interval_count  ? 
_diffrn_standards_number          0 
_diffrn_standards_decay_%         ? 
 
_diffrn_ambient_temperature        120
_diffrn_reflns_number             10197 
_reflns_number_total              3981 
_diffrn_reflns_av_R_equivalents   0.051 
# Number of reflections with Friedels Law is 2194 
# Number of reflections without Friedels Law is 3981 
# Theoretical number of reflections is about 2083 
 
 
_diffrn_reflns_theta_min          1.552 
_diffrn_reflns_theta_max          21.959 
_diffrn_measured_fraction_theta_max 0.992 
 
_diffrn_reflns_theta_full         18.446 
_diffrn_measured_fraction_theta_full 0.995 
 
 
_diffrn_reflns_limit_h_min        -12 
_diffrn_reflns_limit_h_max        12 
_diffrn_reflns_limit_k_min        -11 
_diffrn_reflns_limit_k_max        11 
_diffrn_reflns_limit_l_min        -13 
_diffrn_reflns_limit_l_max        13 
_reflns_limit_h_min               -12 
_reflns_limit_h_max               12 
_reflns_limit_k_min               -11 
_reflns_limit_k_max               11 
_reflns_limit_l_min               0 
_reflns_limit_l_max               13 
 
_oxford_diffrn_Wilson_B_factor    0.00 
_oxford_diffrn_Wilson_scale       0.00 
 
_atom_sites_solution_primary      direct #heavy,direct,difmap,geom
# _atom_sites_solution_secondary  difmap
_atom_sites_solution_hydrogens    geom
 
_refine_diff_density_min          -0.79 
_refine_diff_density_max          0.80 
 
 
_refine_ls_number_reflns          3981 
_refine_ls_number_restraints      7 
_refine_ls_number_parameters      433 
 
#_refine_ls_R_factor_ref 0.0707 
_refine_ls_wR_factor_ref          0.0907 
_refine_ls_goodness_of_fit_ref    0.8504 
 
#_reflns_number_all 3981 
_refine_ls_R_factor_all           0.0707 
_refine_ls_wR_factor_all          0.0907 
 
# No actual I/u(I) cutoff was used for refinement. The
# threshold below is used for "_gt" information ONLY:
_reflns_threshold_expression      I>2.0\s(I)
_reflns_number_gt                 2738 
_refine_ls_R_factor_gt            0.0437 
_refine_ls_wR_factor_gt           0.0715 
 
_refine_ls_shift/su_max           0.000401 
 
_refine_ls_abs_structure_Flack    0.041(17) 
_refine_ls_abs_structure_details  'Flack (1983), 1787 Friedel-pairs' 
# choose from: rm (reference molecule of known chirality), 
# ad (anomolous dispersion - Flack), rmad (rm and ad), 
# syn (from synthesis), unk (unknown) or . (not applicable). 
_chemical_absolute_configuration  'ad' 
 
 
_refine_ls_structure_factor_coef  Fsqd 
_refine_ls_matrix_type            full
_refine_ls_hydrogen_treatment     constr         # none, undef, noref, refall,
                                                 # refxyz, refU, constr or mixed
_refine_ls_weighting_scheme       calc 
_refine_ls_weighting_details 
;
 Method, part 1, Chebychev polynomial, (Watkin, 1994, Prince, 1982) 
 [weight] = 1.0/[A~0~*T~0~(x)+A~1~*T~1~(x) ... +A~n-1~]*T~n-1~(x)] 
 where A~i~ are the Chebychev coefficients listed below and x= Fcalc/Fmax 
 Method = Robust Weighting (Prince, 1982) 
 W = [weight] * [1-(deltaF/6*sigmaF)^2^]^2^ 
 A~i~ are: 
 18.3 18.3 5.26 
;
 
 
 
# Check this file using the IUCr facility at: 
# http://checkcif.iucr.org/ 
 
# The content below is held in the file 'script/refcif.dat'. This is a text 
# file which you may edit to reflect local conditions. 
# Items which need looking at are represented by a '?'. 
# Items for which there are choices are prefixed with 'choose from'. 
 
_publ_contact_letter 
; 
 Please consider this CIF submission for 
 publication as a Short Format Paper in Acta 
 Crystallographica E. The figures will be 
 sent by e-mail. 
; 
_publ_contact_author_name         'Anthony Other' 
_publ_contact_author_address 
; 
 Chemical Crystallography Laboratory, 
 Department of Chemistry, 
 University of Nowhere, 
 Nowhere, NO1 4T, UK. 
; 
 
_publ_contact_author_phone        '+44 1865 000000' 
_publ_contact_author_fax          '+44 1865 000000' 
_publ_contact_author_email        'a.n.other@chem.no.ac.uk' 
_publ_requested_journal           'Section E' 
_publ_requested_category          EO # choose from: FI FM FO CI CM CO AD 
_publ_requested_coeditor_name     'Prof William Clegg' 
 
_publ_section_title 
# Title of paper - generally just the systematic or trivial name 
; ? 
; 
 
# The loop structure below should contain the names and addresses of all 
# authors, in the required order of publication. Repeat as necessary. 
loop_ 
 _publ_author_name 
 _publ_author_address 
 _publ_author_footnote 
 'Other, Anthony N.' # Author 1 
; 
 ? # Address for author 1 
; 
; 
 ? # Footnote for author 1 
; 
 'Else, S. O.' # Author 2 
; 
 ? # Address 2 
; 
; 
 ? # Footnote 2 
; 
 
 
_publ_section_abstract 
# Text of the abstract 
# (a) The Abstract must be self-contained and comprehensible 
# without the rest of the paper. This means no references 
# to atom names or to compound numbers; compounds must be 
# identified as the title compound, or by name or by some other 
# means such as derivatives of each other (e.g. "the 
# corresponding ketone"). 
# (b) The chemical formula of "the title compound" must be given. 
# (c) Any crystallographic molecular symmetry should be 
# mentioned, and also the presence of more than one molecule 
# in the asymmetric unit (i.e. anything other than Z'=1). 
; 
? 
; 
_publ_section_comment 
# Text of the paper 
# Note that atoms are referenced as N2, not N(2) or N~2~ 
# If text containing () occur within (), the outer ones should be [] 
# Figures should be referenced as Fih. 
; 
? 
; 
_publ_section_acknowledgements    # Acknowledgments 
; 
? 
; 
_publ_section_figure_captions 
# Captions to figures - Start each caption on a new line after a blank line 
; 
Fig. 1. 
The title compound with displacement ellipsoids drawn at the 50% 
probability level. H atoms are shown as spheres of 
arbitary radius. 
 
; 
 
_publ_section_exptl_refinement 
# Some potentially useful phrases are donated by Bill Clegg: 
; 
In the absence of significant anomalous scattering, Friedel pairs were 
merged. 
 
The absolute configuration was arbitrarily assigned. 
 
The relatively large ratio of minimum to maximum corrections applied 
in the multiscan process (1:nnn) reflect changes in the illuminated 
volume of the crystal. 
 
Changes in illuminated volume were kept to a minimum, and were 
taken into account (G\"orbitz, 1999) by the multi-scan inter-frame 
scaling (DENZO/SCALEPACK, Otwinowski & Minor, 1997). 
 
 
G\"orbitz, C. H. (1999). Acta Cryst. B55, 1090-1098. 
 
 
 
 
The H atoms were all located in a difference map, but those 
attached to carbon atoms were repositioned geometrically. 
The H atoms were initially refined with soft restraints on the 
bond lengths and angles to regularise their geometry 
(C---H in the range 0.93--0.98, 
N---H in the range 0.86--0.89 
N---H to 0.86 
O---H = 0.82 
\%A) 
and 
U~iso~(H) (in the range 1.2-1.5 times U~eq~ of the parent atom), 
after which the positions were refined with riding constraints. 
 
; 
 
_publ_section_exptl_prep 
# Brief details or a reference. Include solvent if known 
; 
? 
; 
 
 
# PROCESSING SUMMARY (IUCr Office Use Only): 
_journal_date_recd_electronic     ? 
_journal_date_to_coeditor         ? 
_journal_date_from_coeditor       ? 
_journal_date_accepted            ? 
_journal_date_printers_first      ? 
_journal_date_printers_final      ? 
_journal_date_proofs_out          ? 
_journal_date_proofs_in           ? 
_journal_coeditor_name            ? 
_journal_coeditor_code            ? 
_journal_coeditor_notes           ? 
_journal_techeditor_code          ? 
_journal_techeditor_notes         ? 
_journal_coden_ASTM               ? 
_journal_name_full                ? 
_journal_year                     ? 
_journal_volume                   ? 
_journal_issue                    ? 
_journal_page_first               ? 
_journal_page_last                ? 
_journal_suppl_publ_number        ? 
_journal_suppl_publ_pages         ? 
 
# End of 'script/refcif.dat' 
 
 
 
# Insert your own references if required - in alphabetical order 
_publ_section_references 
; 
Altomare, A., Cascarano, G., Giacovazzo, G., Guagliardi, A., Burla, M.C., 
Polidori, G. & Camalli, M. (1994). J. Appl. Cryst. 27, 435. 
 
Betteridge, P.W., Carruthers, J.R., Cooper, R.I., 
Prout, K. & Watkin, D.J. (2003). J. Appl. Cryst. 36, 1487. 
 
Flack, H. D. (1983). Acta Cryst. A39, 876-881. 
 
Larson, A.C. (1970) Crystallographic Computing, Ed Ahmed, F.R., 
Munksgaard, Copenhagen, 291-294. 
 
Otwinowski, Z. & Minor, W. (1997). Methods in Enzymology, Vol. 276, 
edited by C. W. Carter Jr & R. M. Sweet, pp. 307--326. 
New York: Academic Press. 
 
Prince, E. 
Mathematical Techniques in Crystallography 
and Materials Science 
Springer-Verlag, New York, 1982. 
 
Siemens Industrial Automation, Inc (1993). 
SMART: Area-Detector Software Package; Madison, WI. 
 
Siemens Industrial Automation, Inc (1995). 
SAINT: Area-Detector Integration Software.; Madison, WI. 
 
Watkin D.J. (1994). 
Acta Cryst, A50, 411-437. 
 
Watkin, D.J., Prout, C.K. & Pearce, L.J. (1996). CAMERON, Chemical 
Crystallography Laboratory, Oxford, UK. 
; 

# Uequiv = arithmetic mean of Ui i.e. Ueqiv = (U1+U2+U3)/3

# Replace last . with number of unfound hydrogen atomsattached to an atom.

# ..._refinement_flags_... 
# . no refinement constraints           S special position constraint on site
# G rigid group refinement of site      R riding atom
# D distance or angle restraint on site T thermal displacement constraints
# U Uiso or Uij restraint (rigid bond)  P partial occupancy constraint


loop_
_atom_site_label
_atom_site_type_symbol
_atom_site_fract_x
_atom_site_fract_y
_atom_site_fract_z
_atom_site_U_iso_or_equiv
_atom_site_occupancy
_atom_site_adp_type
_atom_site_refinement_flags_posn
_atom_site_refinement_flags_adp
_atom_site_refinement_flags_occupancy
_atom_site_disorder_assembly
_atom_site_disorder_group
_atom_site_attached_hydrogens
Br1 Br 0.29260(9) 0.48803(18) 0.66363(9) 0.0487 1.0000 Uani . . . . . . 
Br2 Br 0.64196(11) 0.40998(18) 0.32587(9) 0.0534 1.0000 Uani . . . . . . 
Cl1 Cl 0.3436(4) -0.2610(3) 0.4459(3) 0.0660 1.0000 Uani . . . . . . 
Cl2 Cl 0.6712(4) 1.1774(4) 0.1168(2) 0.0655 1.0000 Uani . . . . . . 
C1 C 0.3167(9) -0.1049(12) 0.1828(8) 0.0339 1.0000 Uani . . . . . . 
C2 C 0.2531(9) -0.1236(10) 0.2784(9) 0.0373 1.0000 Uani . . . . . . 
C3 C 0.1952(7) 0.0050(10) 0.2963(7) 0.0246 1.0000 Uani . . . . . . 
C4 C 0.2773(9) 0.1149(9) 0.3039(8) 0.0306 1.0000 Uani . . . . . . 
C5 C 0.3926(9) 0.0550(10) 0.2956(8) 0.0386 1.0000 Uani . . . . . . 
C6 C 0.4161(8) -0.0406(11) 0.3741(8) 0.0397 1.0000 Uani . . . . . . 
C7 C 0.3427(10) -0.1358(10) 0.3668(9) 0.0397 1.0000 Uani . . . . . . 
C8 C 0.2790(9) 0.1995(10) 0.3949(8) 0.0257 1.0000 Uani . . . . . . 
C9 C 0.2499(10) 0.1666(11) 0.4878(8) 0.0415 1.0000 Uani . . . . . . 
C10 C 0.2542(10) 0.2511(11) 0.5681(9) 0.0464 1.0000 Uani . . . . . . 
C11 C 0.2880(8) 0.3701(10) 0.5560(8) 0.0349 1.0000 Uani . . . . . . 
C12 C 0.3255(10) 0.4052(12) 0.4613(9) 0.0546 1.0000 Uani . . . . . . 
C13 C 0.3180(11) 0.3195(12) 0.3838(9) 0.0548 1.0000 Uani . . . . . . 
C14 C 0.1054(8) 0.0272(9) 0.2093(9) 0.0345 1.0000 Uani . . . . . . 
C15 C -0.0075(9) 0.0504(12) 0.2360(10) 0.0632 1.0000 Uani . . . . . . 
C16 C 0.6774(8) 1.0147(10) -0.1430(9) 0.0293 1.0000 Uani . . . . . . 
C17 C 0.7356(8) 1.0229(9) -0.0374(8) 0.0338 1.0000 Uani . . . . . . 
C18 C 0.7740(8) 0.8870(9) -0.0049(7) 0.0302 1.0000 Uani . . . . . . 
C19 C 0.6728(8) 0.7984(9) -0.0216(8) 0.0268 1.0000 Uani . . . . . . 
C20 C 0.5751(10) 0.8789(13) -0.0542(9) 0.0559 1.0000 Uani . . . . . . 
C21 C 0.5607(9) 0.9814(14) 0.0215(8) 0.0533 1.0000 Uani . . . . . . 
C22 C 0.6469(10) 1.0545(12) 0.0328(8) 0.0412 1.0000 Uani . . . . . . 
C23 C 0.6611(9) 0.7063(10) 0.0665(8) 0.0265 1.0000 Uani . . . . . . 
C24 C 0.7198(10) 0.5959(12) 0.0680(9) 0.0520 1.0000 Uani . . . . . . 
C25 C 0.7159(9) 0.5087(12) 0.1465(9) 0.0506 1.0000 Uani . . . . . . 
C26 C 0.6495(10) 0.5312(10) 0.2190(9) 0.0415 1.0000 Uani . . . . . . 
C27 C 0.5888(10) 0.6386(11) 0.2199(9) 0.0450 1.0000 Uani . . . . . . 
C28 C 0.5972(10) 0.7277(12) 0.1438(9) 0.0482 1.0000 Uani . . . . . . 
C29 C 0.8678(9) 0.8447(9) -0.0651(9) 0.0385 1.0000 Uani . . . . . . 
C30 C 0.9748(9) 0.8191(12) -0.0111(9) 0.0618 1.0000 Uani . . . . . . 
C31 C 0.9736(18) 0.362(2) 0.4570(18) 0.1078 1.0000 Uani . U . . . . 
C32 C 0.9397(13) 0.2367(15) 0.4822(13) 0.1091 1.0000 Uani . U . . . . 
C33 C 1.0659(13) 0.489(2) 0.3436(15) 0.1247 1.0000 Uani . . . . . . 
C34 C 0.9738(11) 0.5580(16) 0.2760(15) 0.1220 1.0000 Uani . . . . . . 
O1 O 0.3080(6) -0.1694(7) 0.1081(6) 0.0400 1.0000 Uani . . . . . . 
O2 O 0.1784(6) -0.2193(6) 0.2646(5) 0.0442 1.0000 Uani . . . . . . 
O3 O 0.3846(5) -0.0063(8) 0.1936(5) 0.0401 1.0000 Uani . . . . . . 
O4 O 0.1272(6) 0.0316(7) 0.1240(6) 0.0490 1.0000 Uani . . . . . . 
O5 O 0.6998(6) 1.0729(7) -0.2184(5) 0.0348 1.0000 Uani . . . . . . 
O6 O 0.8258(6) 1.1032(6) -0.0322(5) 0.0406 1.0000 Uani . . . . . . 
O7 O 0.5928(6) 0.9321(7) -0.1514(5) 0.0455 1.0000 Uani . . . . . . 
O8 O 0.8457(6) 0.8345(7) -0.1573(6) 0.0460 1.0000 Uani . . . . . . 
O9 O 1.0214(11) 0.3646(12) 0.3690(9) 0.1110 1.0000 Uani . . . . . . 
O10 O 0.9648(11) 0.4567(14) 0.5084(10) 0.1130 1.0000 Uani . . . . . . 
H31 H 0.1624 0.0000 0.3583 0.0302 1.0000 Uiso R . . . . . 
H41 H 0.2604 0.1662 0.2453 0.0374 1.0000 Uiso R . . . . . 
H51 H 0.4479 0.1182 0.3006 0.0485 1.0000 Uiso R . . . . . 
H61 H 0.4766 -0.0364 0.4250 0.0482 1.0000 Uiso R . . . . . 
H91 H 0.2259 0.0827 0.4979 0.0514 1.0000 Uiso R . . . . . 
H101 H 0.2332 0.2246 0.6320 0.0570 1.0000 Uiso R . . . . . 
H121 H 0.3548 0.4869 0.4523 0.0653 1.0000 Uiso R . . . . . 
H131 H 0.3407 0.3436 0.3199 0.0639 1.0000 Uiso R . . . . . 
H151 H -0.0551 0.0624 0.1753 0.0758 1.0000 Uiso R . . . . . 
H152 H -0.0318 -0.0200 0.2723 0.0758 1.0000 Uiso R . . . . . 
H153 H -0.0080 0.1238 0.2773 0.0758 1.0000 Uiso R . . . . . 
H181 H 0.7994 0.8875 0.0656 0.0363 1.0000 Uiso R . . . . . 
H191 H 0.6841 0.7476 -0.0789 0.0324 1.0000 Uiso R . . . . . 
H201 H 0.5114 0.8275 -0.0616 0.0672 1.0000 Uiso R . . . . . 
H211 H 0.4974 0.9920 0.0565 0.0657 1.0000 Uiso R . . . . . 
H241 H 0.7635 0.5785 0.0142 0.0645 1.0000 Uiso R . . . . . 
H251 H 0.7595 0.4346 0.1486 0.0616 1.0000 Uiso R . . . . . 
H271 H 0.5418 0.6525 0.2717 0.0546 1.0000 Uiso R . . . . . 
H281 H 0.5577 0.8047 0.1454 0.0596 1.0000 Uiso R . . . . . 
H301 H 1.0241 0.7942 -0.0584 0.0744 1.0000 Uiso R . . . . . 
H302 H 0.9683 0.7531 0.0366 0.0744 1.0000 Uiso R . . . . . 
H303 H 1.0019 0.8929 0.0239 0.0744 1.0000 Uiso R . . . . . 
H321 H 0.9070 0.2382 0.5445 0.1328 1.0000 Uiso R . . . . . 
H322 H 0.8881 0.2065 0.4292 0.1328 1.0000 Uiso R . . . . . 
H323 H 1.0017 0.1826 0.4891 0.1328 1.0000 Uiso R . . . . . 
H331 H 1.1284 0.4780 0.3075 0.1584 1.0000 Uiso R . . . . . 
H332 H 1.0858 0.5351 0.4042 0.1584 1.0000 Uiso R . . . . . 
H341 H 0.9996 0.6387 0.2583 0.1444 1.0000 Uiso R . . . . . 
H342 H 0.9542 0.5105 0.2158 0.1444 1.0000 Uiso R . . . . . 
H343 H 0.9115 0.5676 0.3125 0.1444 1.0000 Uiso R . . . . . 
H6 H 0.7887 1.1663 -0.0532 0.0474 1.0000 Uiso R . . . . . 
H2 H 0.2155 -0.2823 0.2506 0.0533 1.0000 Uiso R . . . . . 
loop_
_atom_site_aniso_label
_atom_site_aniso_U_11
_atom_site_aniso_U_22
_atom_site_aniso_U_33
_atom_site_aniso_U_23
_atom_site_aniso_U_13
_atom_site_aniso_U_12
Br1 0.0413(7) 0.0487(8) 0.0557(8) -0.0197(7) 0.0028(6) -0.0004(7) 
Br2 0.0725(9) 0.0450(8) 0.0417(7) 0.0125(7) 0.0010(6) -0.0087(7) 
Cl1 0.127(4) 0.0341(19) 0.037(2) 0.0044(15) 0.010(2) 0.015(2) 
Cl2 0.120(4) 0.048(2) 0.0302(18) -0.0005(16) 0.018(2) 0.037(2) 
C1 0.045(8) 0.023(7) 0.033(7) -0.005(6) 0.006(5) 0.003(6) 
C2 0.044(8) 0.025(7) 0.045(7) 0.005(5) 0.015(6) 0.002(6) 
C3 0.024(5) 0.027(6) 0.027(6) 0.005(5) 0.019(4) 0.002(5) 
C4 0.038(7) 0.022(6) 0.033(7) 0.011(5) 0.010(5) 0.000(5) 
C5 0.029(7) 0.045(7) 0.044(8) 0.011(6) 0.014(6) 0.009(6) 
C6 0.025(6) 0.057(9) 0.039(7) 0.007(6) 0.009(5) 0.016(6) 
C7 0.057(8) 0.028(7) 0.037(7) 0.000(5) 0.022(7) 0.024(7) 
C8 0.024(7) 0.022(6) 0.031(7) -0.008(5) 0.000(6) -0.012(5) 
C9 0.049(9) 0.038(8) 0.040(8) -0.001(6) 0.014(6) -0.018(6) 
C10 0.059(9) 0.041(8) 0.041(8) -0.004(6) 0.014(6) -0.008(7) 
C11 0.030(7) 0.033(8) 0.039(7) -0.005(5) -0.008(5) -0.003(5) 
C12 0.081(10) 0.027(7) 0.054(8) 0.004(8) -0.004(7) -0.013(8) 
C13 0.085(11) 0.051(9) 0.025(7) -0.007(7) -0.006(7) -0.012(8) 
C14 0.033(7) 0.030(7) 0.044(8) -0.006(5) 0.017(6) -0.004(5) 
C15 0.040(8) 0.084(11) 0.066(10) -0.007(8) 0.008(7) 0.015(7) 
C16 0.030(7) 0.018(7) 0.041(8) -0.010(6) 0.006(5) 0.005(5) 
C17 0.041(7) 0.035(7) 0.024(6) 0.005(5) -0.004(5) -0.001(5) 
C18 0.041(7) 0.032(7) 0.018(5) -0.002(5) 0.006(5) -0.010(6) 
C19 0.040(7) 0.018(6) 0.025(6) -0.012(5) 0.017(5) -0.010(5) 
C20 0.047(8) 0.066(11) 0.053(9) 0.020(7) 0.001(6) -0.008(7) 
C21 0.044(8) 0.075(10) 0.044(8) 0.038(8) 0.022(6) 0.017(9) 
C22 0.051(8) 0.048(8) 0.027(7) 0.007(6) 0.019(6) 0.020(7) 
C23 0.028(7) 0.016(6) 0.034(7) 0.003(5) -0.003(6) -0.002(5) 
C24 0.054(9) 0.073(10) 0.034(8) -0.004(7) 0.026(6) -0.003(8) 
C25 0.061(8) 0.045(8) 0.049(8) 0.004(7) 0.022(6) 0.012(7) 
C26 0.056(8) 0.023(7) 0.045(8) 0.006(5) 0.006(6) -0.011(6) 
C27 0.039(8) 0.053(9) 0.047(8) 0.005(7) 0.024(6) -0.005(7) 
C28 0.053(10) 0.047(9) 0.047(8) 0.009(7) 0.018(7) -0.008(7) 
C29 0.037(7) 0.023(6) 0.054(8) -0.013(6) -0.005(6) -0.010(5) 
C30 0.039(8) 0.083(11) 0.063(9) -0.020(8) 0.000(6) 0.023(7) 
C31 0.097(11) 0.106(13) 0.128(12) -0.004(10) 0.046(9) 0.014(10) 
C32 0.099(11) 0.106(13) 0.129(12) -0.003(10) 0.045(9) 0.013(10) 
C33 0.083(13) 0.134(18) 0.166(19) 0.062(17) 0.055(13) 0.007(15) 
C34 0.036(9) 0.130(17) 0.19(2) -0.020(15) -0.030(11) 0.022(10) 
O1 0.057(6) 0.036(5) 0.030(5) -0.001(4) 0.019(4) 0.002(4) 
O2 0.066(6) 0.021(4) 0.051(5) 0.002(4) 0.033(4) -0.002(4) 
O3 0.039(4) 0.061(5) 0.023(4) -0.009(4) 0.014(3) -0.009(5) 
O4 0.041(5) 0.070(6) 0.036(5) -0.001(4) 0.008(4) -0.003(4) 
O5 0.045(5) 0.030(4) 0.030(5) 0.011(4) 0.009(4) 0.003(4) 
O6 0.041(5) 0.032(4) 0.048(5) -0.011(4) 0.002(4) -0.008(4) 
O7 0.047(5) 0.061(6) 0.028(4) 0.017(4) 0.000(3) -0.018(4) 
O8 0.045(5) 0.051(5) 0.043(5) 0.000(4) 0.010(4) 0.013(4) 
O9 0.142(11) 0.107(10) 0.094(9) -0.012(7) 0.060(8) -0.006(8) 
O10 0.096(8) 0.136(12) 0.113(10) -0.008(9) 0.037(7) 0.007(8) 

_refine_ls_extinction_method 
    'None'
_oxford_refine_ls_scale 0.3598(3) 
loop_
 _geom_bond_atom_site_label_1
 _geom_bond_site_symmetry_1
 _geom_bond_atom_site_label_2
 _geom_bond_site_symmetry_2
 _geom_bond_distance
 _geom_bond_publ_flag
Br1 . C11 . 1.888(10)    yes
Br2 . C26 . 1.917(11)    yes
Cl1 . C7 . 1.687(11)    yes
Cl2 . C22 . 1.717(13)    yes
C1 . C2 . 1.561(14)    yes
C1 . O1 . 1.196(12)    yes
C1 . O3 . 1.335(13)    yes
C2 . C3 . 1.566(14)    yes
C2 . C7 . 1.524(16)    yes
C2 . O2 . 1.367(12)    yes
C3 . C4 . 1.536(13)    yes
C3 . C14 . 1.525(14)    yes
C3 . H31 . 0.950    no
C4 . C5 . 1.566(14)    yes
C4 . C8 . 1.497(14)    yes
C4 . H41 . 0.950    no
C5 . C6 . 1.457(14)    yes
C5 . O3 . 1.487(13)    yes
C5 . H51 . 0.950    no
C6 . C7 . 1.349(15)    yes
C6 . H61 . 0.950    no
C8 . C9 . 1.357(13)    yes
C8 . C13 . 1.372(16)    yes
C9 . C10 . 1.384(14)    yes
C9 . H91 . 0.950    no
C10 . C11 . 1.343(15)    yes
C10 . H101 . 0.950    no
C11 . C12 . 1.424(15)    yes
C12 . C13 . 1.364(16)    yes
C12 . H121 . 0.950    no
C13 . H131 . 0.950    no
C14 . C15 . 1.486(14)    yes
C14 . O4 . 1.184(11)    yes
C15 . H151 . 0.950    no
C15 . H152 . 0.950    no
C15 . H153 . 0.950    no
C16 . C17 . 1.501(14)    yes
C16 . O5 . 1.225(12)    yes
C16 . O7 . 1.354(12)    yes
C17 . C18 . 1.562(14)    yes
C17 . C22 . 1.536(14)    yes
C17 . O6 . 1.393(11)    yes
C18 . C19 . 1.555(13)    yes
C18 . C29 . 1.532(14)    yes
C18 . H181 . 0.950    no
C19 . C20 . 1.498(15)    yes
C19 . C23 . 1.535(14)    yes
C19 . H191 . 0.950    no
C20 . C21 . 1.498(17)    yes
C20 . O7 . 1.438(13)    yes
C20 . H201 . 0.950    no
C21 . C22 . 1.308(16)    yes
C21 . H211 . 0.950    no
C23 . C24 . 1.373(16)    yes
C23 . C28 . 1.368(15)    yes
C24 . C25 . 1.393(16)    yes
C24 . H241 . 0.950    no
C25 . C26 . 1.339(14)    yes
C25 . H251 . 0.950    no
C26 . C27 . 1.361(15)    yes
C27 . C28 . 1.390(15)    yes
C27 . H271 . 0.950    no
C28 . H281 . 0.950    no
C29 . C30 . 1.454(14)    yes
C29 . O8 . 1.224(12)    yes
C30 . H301 . 0.950    no
C30 . H302 . 0.950    no
C30 . H303 . 0.950    no
C31 . C32 . 1.44(2)    yes
C31 . O9 . 1.35(2)    yes
C31 . O10 . 1.22(2)    yes
C32 . H321 . 0.950    no
C32 . H322 . 0.950    no
C32 . H323 . 0.950    no
C33 . C34 . 1.55(2)    yes
C33 . O9 . 1.48(2)    yes
C33 . H331 . 0.950    no
C33 . H332 . 0.950    no
C34 . H341 . 0.950    no
C34 . H342 . 0.950    no
C34 . H343 . 0.950    no
O2 . H2 . 0.840    no
O6 . H6 . 0.840    no
loop_
 _geom_angle_atom_site_label_1
 _geom_angle_site_symmetry_1
 _geom_angle_atom_site_label_2
 _geom_angle_site_symmetry_2
 _geom_angle_atom_site_label_3
 _geom_angle_site_symmetry_3
 _geom_angle
 _geom_angle_publ_flag
C2 . C1 . O1 . 125.7(10)    yes
C2 . C1 . O3 . 111.8(9)    yes
O1 . C1 . O3 . 122.5(10)    yes
C1 . C2 . C3 . 106.4(8)    yes
C1 . C2 . C7 . 104.3(9)    yes
C3 . C2 . C7 . 105.2(8)    yes
C1 . C2 . O2 . 111.8(9)    yes
C3 . C2 . O2 . 110.9(9)    yes
C7 . C2 . O2 . 117.4(9)    yes
C2 . C3 . C4 . 111.4(7)    yes
C2 . C3 . C14 . 109.0(8)    yes
C4 . C3 . C14 . 110.5(8)    yes
C2 . C3 . H31 . 108.7    no
C4 . C3 . H31 . 108.6    no
C14 . C3 . H31 . 108.6    no
C3 . C4 . C5 . 106.2(8)    yes
C3 . C4 . C8 . 117.5(9)    yes
C5 . C4 . C8 . 111.1(9)    yes
C3 . C4 . H41 . 107.1    no
C5 . C4 . H41 . 107.3    no
C8 . C4 . H41 . 107.1    no
C4 . C5 . C6 . 110.2(8)    yes
C4 . C5 . O3 . 105.3(8)    yes
C6 . C5 . O3 . 109.2(9)    yes
C4 . C5 . H51 . 110.7    no
C6 . C5 . H51 . 110.7    no
O3 . C5 . H51 . 110.6    no
C5 . C6 . C7 . 112.9(10)    yes
C5 . C6 . H61 . 123.6    no
C7 . C6 . H61 . 123.5    no
C2 . C7 . Cl1 . 119.9(9)    yes
C2 . C7 . C6 . 114.5(10)    yes
Cl1 . C7 . C6 . 125.6(10)    yes
C4 . C8 . C9 . 125.9(10)    yes
C4 . C8 . C13 . 116.5(9)    yes
C9 . C8 . C13 . 117.5(10)    yes
C8 . C9 . C10 . 122.1(11)    yes
C8 . C9 . H91 . 118.8    no
C10 . C9 . H91 . 119.2    no
C9 . C10 . C11 . 120.4(11)    yes
C9 . C10 . H101 . 119.7    no
C11 . C10 . H101 . 119.9    no
Br1 . C11 . C10 . 121.2(9)    yes
Br1 . C11 . C12 . 120.0(9)    yes
C10 . C11 . C12 . 118.7(11)    yes
C11 . C12 . C13 . 118.7(12)    yes
C11 . C12 . H121 . 120.6    no
C13 . C12 . H121 . 120.7    no
C8 . C13 . C12 . 122.3(12)    yes
C8 . C13 . H131 . 118.8    no
C12 . C13 . H131 . 118.8    no
C3 . C14 . C15 . 117.9(9)    yes
C3 . C14 . O4 . 120.3(9)    yes
C15 . C14 . O4 . 121.7(11)    yes
C14 . C15 . H151 . 109.3    no
C14 . C15 . H152 . 109.7    no
H151 . C15 . H152 . 109.5    no
C14 . C15 . H153 . 109.4    no
H151 . C15 . H153 . 109.5    no
H152 . C15 . H153 . 109.5    no
C17 . C16 . O5 . 126.8(10)    yes
C17 . C16 . O7 . 113.7(10)    yes
O5 . C16 . O7 . 119.6(9)    yes
C16 . C17 . C18 . 107.6(8)    yes
C16 . C17 . C22 . 105.8(9)    yes
C18 . C17 . C22 . 104.3(8)    yes
C16 . C17 . O6 . 112.5(8)    yes
C18 . C17 . O6 . 109.5(8)    yes
C22 . C17 . O6 . 116.5(9)    yes
C17 . C18 . C19 . 107.7(8)    yes
C17 . C18 . C29 . 110.4(8)    yes
C19 . C18 . C29 . 112.5(8)    yes
C17 . C18 . H181 . 108.9    no
C19 . C18 . H181 . 108.6    no
C29 . C18 . H181 . 108.7    no
C18 . C19 . C20 . 107.5(9)    yes
C18 . C19 . C23 . 114.3(9)    yes
C20 . C19 . C23 . 116.5(9)    yes
C18 . C19 . H191 . 106.0    no
C20 . C19 . H191 . 105.8    no
C23 . C19 . H191 . 105.9    no
C19 . C20 . C21 . 111.5(10)    yes
C19 . C20 . O7 . 106.8(10)    yes
C21 . C20 . O7 . 110.4(10)    yes
C19 . C20 . H201 . 109.3    no
C21 . C20 . H201 . 109.4    no
O7 . C20 . H201 . 109.3    no
C20 . C21 . C22 . 110.8(11)    yes
C20 . C21 . H211 . 124.6    no
C22 . C21 . H211 . 124.6    no
C17 . C22 . Cl2 . 117.9(9)    yes
C17 . C22 . C21 . 114.7(11)    yes
Cl2 . C22 . C21 . 127.4(10)    yes
C19 . C23 . C24 . 117.6(10)    yes
C19 . C23 . C28 . 124.3(10)    yes
C24 . C23 . C28 . 118.1(11)    yes
C23 . C24 . C25 . 121.1(11)    yes
C23 . C24 . H241 . 119.3    no
C25 . C24 . H241 . 119.5    no
C24 . C25 . C26 . 118.9(12)    yes
C24 . C25 . H251 . 120.5    no
C26 . C25 . H251 . 120.6    no
Br2 . C26 . C25 . 119.0(9)    yes
Br2 . C26 . C27 . 119.1(9)    yes
C25 . C26 . C27 . 121.9(11)    yes
C26 . C27 . C28 . 118.8(11)    yes
C26 . C27 . H271 . 120.6    no
C28 . C27 . H271 . 120.6    no
C27 . C28 . C23 . 121.0(12)    yes
C27 . C28 . H281 . 119.5    no
C23 . C28 . H281 . 119.5    no
C18 . C29 . C30 . 119.3(10)    yes
C18 . C29 . O8 . 116.1(9)    yes
C30 . C29 . O8 . 124.6(11)    yes
C29 . C30 . H301 . 109.5    no
C29 . C30 . H302 . 109.2    no
H301 . C30 . H302 . 109.5    no
C29 . C30 . H303 . 109.7    no
H301 . C30 . H303 . 109.5    no
H302 . C30 . H303 . 109.5    no
C32 . C31 . O9 . 112.3(18)    yes
C32 . C31 . O10 . 126(2)    yes
O9 . C31 . O10 . 122(2)    yes
C31 . C32 . H321 . 110.0    no
C31 . C32 . H322 . 109.0    no
H321 . C32 . H322 . 109.5    no
C31 . C32 . H323 . 109.3    no
H321 . C32 . H323 . 109.5    no
H322 . C32 . H323 . 109.5    no
C34 . C33 . O9 . 106.7(15)    yes
C34 . C33 . H331 . 110.3    no
O9 . C33 . H331 . 110.2    no
C34 . C33 . H332 . 110.2    no
O9 . C33 . H332 . 109.9    no
H331 . C33 . H332 . 109.5    no
C33 . C34 . H341 . 109.1    no
C33 . C34 . H342 . 109.6    no
H341 . C34 . H342 . 109.5    no
C33 . C34 . H343 . 109.6    no
H341 . C34 . H343 . 109.5    no
H342 . C34 . H343 . 109.5    no
C2 . O2 . H2 . 104.3    no
C5 . O3 . C1 . 114.9(8)    yes
C17 . O6 . H6 . 93.9    no
C20 . O7 . C16 . 111.5(9)    yes
C33 . O9 . C31 . 114.7(15)    yes
